# Supplementary material
Source: Research Square preprint supplement (doi:10.21203/rs.3.rs-9109584/v1)
Supplement: Supplementary file 1 [file b729cc9c65eb9a70f8d64ea5.docx]

**Supplementary Table 1 Baseline characteristics of training set cohort in this study.** Continuous values were presented as median [interquartile range]. Categorical valueswere presented as numbers (percentages).

|  | **Total(n=465)** | **Non-MAFLD(n=262)** | **MAFLD(n=203)** | **p** |
| --- | --- | --- | --- | --- |
| Gender |  |  |  | 0.024 |
| Female | 19 ( 4.09%) | 16 ( 6.11%) | 3 ( 1.48%) |  |
| Male | 446 (95.91%) | 246 (93.89%) | 200 (98.52%) |  |
| Smoking |  |  |  | 0.296 |
| No | 243 (52.26%) | 143 (54.58%) | 100 (49.26%) |  |
| Yes | 222 (47.74%) | 119 (45.42%) | 103 (50.74%) |  |
| HTN |  |  |  | 0.24 |
| No | 240 (51.61%) | 142 (54.20%) | 98 (48.28%) |  |
| Yes | 225 (48.39%) | 120 (45.80%) | 105 (51.72%) |  |
| DM |  |  |  | 0.869 |
| No | 367 (78.92%) | 208 (79.39%) | 159 (78.33%) |  |
| Yes | 98 (21.08%) | 54 (20.61%) | 44 (21.67%) |  |
| AC |  |  |  | 0.068 |
| HA | 181 (38.92%) | 112 (42.75%) | 69 (33.99%) |  |
| VHA | 284 (61.08%) | 150 (57.25%) | 134 (66.01%) |  |
| ED |  |  |  | 0.115 |
| STE | 1 ( 0.22%) | 1 ( 0.38%) | 0 ( 0.00) |  |
| MTE | 60 (12.90%) | 27 (10.31%) | 33 (16.26%) |  |
| LTE | 404 (86.88%) | 234 (89.31%) | 170 (83.74%) |  |
| PA |  |  |  | 0.013 |
| LPA | 160 (34.41%) | 105 (40.08%) | 55 (27.09%) |  |
| MPA | 114 (24.52%) | 57 (21.76%) | 57 (28.08%) |  |
| HPA | 191 (41.08%) | 100 (38.17%) | 91 (44.83%) |  |
| Dietary |  |  |  | 0.563 |
| LFD | 174 (37.42%) | 96 (36.64%) | 78 (38.42%) |  |
| HFD | 91 (19.57%) | 48 (18.32%) | 43 (21.18%) |  |
| Other | 200 (43.01%) | 118 (45.04%) | 82 (40.39%) |  |
| Tea |  |  |  | 0.027 |
| No | 216 (46.45%) | 134 (51.15%) | 82 (40.39%) |  |
| Yes | 249 (53.55%) | 128 (48.85%) | 121 (59.61%) |  |
| Altitude | 3700.00 [3000.00,3700.00] | 3650.00 [3000.00,3700.00] | 3700.00 [3200.00,3700.00] | 0.013 |
| M | 204.00 [144.00,240.00] | 205.00 [160.50,240.00] | 200.00 [132.00,240.00] | 0.188 |
| Age | 50.00 [45.00,54.00] | 50.00 [45.00,54.00] | 50.00 [46.00,54.00] | 0.834 |
| SBP | 122.00 [111.00,134.00] | 115.00 [107.25,125.00] | 131.00 [120.00,140.00] | <0.001 |
| DBP | 74.00 [67.00,82.00] | 72.00 [65.00,79.00] | 78.00 [71.00,84.00] | <0.001 |
| BMI | 24.75 (2.68) | 23.33 (2.19) | 26.59 (2.08) | <0.001 |
| WBC | 5.74 [4.86,6.64] | 5.29 [4.53,6.14] | 6.41 [5.60,7.49] | <0.001 |
| RBC | 5.14 (0.39) | 4.99 (0.35) | 5.34 (0.35) | <0.001 |
| NEUT | 3.29 [2.76,4.03] | 3.14 [2.62,3.88] | 3.61 [2.92,4.20] | <0.001 |
| LYMPH | 1.66 [1.34,1.99] | 1.59 [1.29,1.89] | 1.75 [1.43,2.13] | <0.001 |
| MONO | 0.34 [0.27,0.41] | 0.32 [0.26,0.39] | 0.35 [0.29,0.45] | 0.001 |
| HGB | 156.11 (10.64) | 152.68 (9.76) | 160.54 (10.09) | <0.001 |
| PLT | 181.00 [151.00,213.00] | 180.50 [151.25,210.00] | 181.00 [151.50,221.00] | 0.515 |
| Urea | 5.20 [4.47,6.03] | 5.19 [4.42,5.95] | 5.27 [4.54,6.15] | 0.25 |
| Cr | 78.33 (10.12) | 78.68 (10.21) | 77.88 (10.00) | 0.394 |
| ALT | 25.10 [17.80,34.80] | 21.25 [15.62,28.25] | 30.40 [22.55,41.00] | <0.001 |
| AST | 22.80 [19.30,28.20] | 21.80 [18.80,26.28] | 24.90 [20.00,29.75] | <0.001 |
| ALT_AST | 1.09 [0.86,1.38] | 0.98 [0.76,1.20] | 1.30 [1.04,1.57] | <0.001 |
| HSI | 34.11 [30.40,37.24] | 31.85 [29.15,34.56] | 36.80 [34.22,39.25] | <0.001 |
| TC | 4.79 (0.80) | 4.74 (0.78) | 4.85 (0.84) | 0.119 |
| TG | 1.65 [1.16,2.47] | 1.31 [0.93,1.75] | 2.42 [1.73,3.08] | <0.001 |
| HDL_C | 1.32 [1.13,1.56] | 1.48 [1.29,1.66] | 1.14 [1.04,1.29] | <0.001 |
| LDL_C | 3.03 (0.65) | 2.93 (0.65) | 3.15 (0.64) | <0.001 |
| TP | 73.75 (3.76) | 73.34 (3.78) | 74.29 (3.67) | 0.007 |
| ALB | 47.30 (2.15) | 47.07 (2.12) | 47.60 (2.17) | 0.009 |
| GLOB | 26.40 [24.30,28.50] | 26.35 [24.20,28.28] | 26.50 [24.35,28.85] | 0.287 |
| A_G | 1.81 [1.65,1.96] | 1.81 [1.65,1.97] | 1.81 [1.65,1.96] | 0.915 |
| TBIL | 18.50 [15.20,23.00] | 19.15 [15.33,23.48] | 18.00 [14.95,22.50] | 0.177 |
| DBIL | 4.40 [3.70,5.40] | 4.50 [3.70,5.50] | 4.30 [3.70,5.10] | 0.072 |
| IBIL | 14.00 [11.40,18.00] | 14.20 [11.80,18.08] | 13.50 [11.35,17.55] | 0.256 |
| PT | 10.80 [10.50,11.00] | 10.80 [10.60,11.00] | 10.60 [10.35,10.80] | <0.001 |
| PTA | 104.10 [101.80,107.70] | 104.10 [101.80,106.50] | 106.50 [104.10,109.65] | <0.001 |
| INR | 0.93 [0.90,0.95] | 0.93 [0.91,0.95] | 0.91 [0.88,0.93] | <0.001 |
| FIB | 2.59 [2.30,2.98] | 2.55 [2.27,3.04] | 2.59 [2.33,2.93] | 0.428 |
| APTT | 26.89 (1.59) | 27.15 (1.57) | 26.56 (1.57) | <0.001 |
| TT | 16.52 (0.75) | 16.50 (0.77) | 16.54 (0.71) | 0.587 |
| DD | 0.11 [0.08,0.19] | 0.11 [0.06,0.19] | 0.13 [0.08,0.21] | 0.138 |
| HbA1c | 5.80 [5.50,6.00] | 5.80 [5.50,6.00] | 5.80 [5.50,6.10] | 0.022 |
